# Supplementary material for: Development and Validation of a Risk Assessment Tool for Gaming Disorder in China: The Gaming Hazard Assessment Scale
Source: Frontiers journal article supplement (doi:10.3389/fpubh.2022.870358), 2022-04-11
Supplement: Table_1.pdf [file Table_1.pdf]

## Appendix A

### The Gaming Hazard Assessment Scale 游戏危害评估量表

In the past 12 months, how often have you experienced the following situations? (0 = never, 1 = sometimes, 2 = often, 3 = always) 请问在过去12个月，以下情况是否有发生在你身上? (0 = 从不，1 = 有时，2 = 常常，3 = 总是)

This scale is a screening tool rather than diagnostic tool for GD. Higher scores indicated higher risk for GD. In details, scored 0-18 indicate no risk, 19-36 indicate moderate risk and 37-54 indicate high risk. 本量表是游戏障碍的筛查工具而非诊断工具，分数越高代表患游戏障碍的风险越高,具体来说，0-18分代表无风险，19-36分代表中风险以及37-54分代表高风险。

| No. | English                                                                                  | Chinese                       | Factor                                    |
|-----|------------------------------------------------------------------------------------------|-------------------------------|-------------------------------------------|
| 1   | I can't control how long or how often I play games.                                      | 我不能控制我玩游戏的时间和频率               | Out of control (失控)                       |
| 2   | I play games more or longer than I want.                                                 | 玩游戏的时间比我预计的要长                 |                                           |
| 3   | Once I start playing, it's hard to stop.                                                 | 一旦开始玩游戏，很难停下                  |                                           |
| 4   | I keep playing the game even if I have lost interest or feel bored with the game itself. | 即使我已经失去了兴趣或对游戏本身感到厌倦，我也会继续玩游戏 |                                           |
| 5   | I have tried to reduce play time or stop playing but failed.                             | 我试图减少游戏时间或停止游戏，但失败了           |                                           |
| 6   | The actual play time is longer than promised.                                            | 实际的游戏时间比承诺的要长                 |                                           |
| 7   | I feel like there's no fun in life except playing games.                                 | 我觉得生活中除了玩游戏就没有什么乐趣了           | Impairment of social functioning (社会功能损害) |
| 8   | I have conflict with family members other than parents due to playing games.             | 因为玩游戏，与父母以外的家庭成员发生了冲突         |                                           |
| 9   | I seldom go out because of playing games.                                                | 因为玩游戏，我很少出去                   |                                           |
| 10  | I rarely socialize with people because of playing games.                                 | 因为玩游戏，我很少与人交往                 |                                           |
| 11  | I have serious sleep problems (e.g., insomnia, wakefulness) caused by playing games.     | 因为玩游戏，我有严重的睡眠问题(如失眠，睡不醒)      |                                           |

|    |                                                                                           |                                   |                                |
|----|-------------------------------------------------------------------------------------------|-----------------------------------|--------------------------------|
| 12 | Playing games costs a lot of money and lowers my living standards.                        | 玩游戏花费了很多金钱，降低了我的生活水平              | Cognitive impairment<br>(认知损害) |
| 13 | I delay important things (e.g., exams, job hunting) because of playing games.             | 因为玩游戏，我耽误了重要的事情(比如考试，找工作)         |                                |
| 14 | I prefer playing games to participating in other entertainment activities.                | 比起参加其他娱乐活动，我更喜欢玩游戏                |                                |
| 15 | When not playing games, I'm still thinking about games or game-related things.            | 当我不玩游戏时，我仍然会思考游戏或与游戏相关的事情         |                                |
| 16 | I get excited when I see or hear something about games.                                   | 当我看到或听到有关游戏的内容时，我就会感到兴奋           |                                |
| 17 | I have thoughts or urges to play games when I see or hear something related to the games. | 当我看到或听到与游戏相关的内容时，我便会产生想要玩游戏的想法或冲动 |                                |
| 18 | I get irritable when I'm asked to stop the game or reduce the time.                       | 当我被要求停止游戏或缩短游戏时间时，我会变得烦躁          |                                |
